# Supplementary material
Source: Springer Nature journal article supplement (https://www.springermedizin.de/resource/supplementary/12885_2011_3042_MOESM2_ESM.pdf/9462732)
Supplement: MOESM2 [file 9462732]

Odds Ratio  
(95% CI)

**KI at baseline:**

≥ 80% vs. < 80%

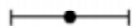

8.76  
(5.84,13.1)

**Prior first-line chemotherapy:**  
Combination vs. single agent

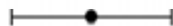

2.20  
(1.27,3.83)

**Time elapsed since  
prior chemotherapy:**

within 3 months  
vs. immediately

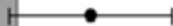

1.67  
(0.95,2.92)

≥ 3 months  
vs. immediately

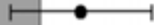

1.33  
(0.82,2.17)

**Grade 3/4 toxicities  
within first two cycles:**  
≥ 1 episode vs. none

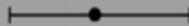

0.27  
(0.15,0.52)

0.1 Reference category more  
likely to be associated  
with KI benefit response

1 Non-reference category more  
likely to be associated  
with KI benefit response 10
